# Supplementary material
Source: Springer Nature journal article supplement (https://www.springermedizin.de/resource/supplementary/12889_2010_2449_MOESM1_ESM.pdf/9485888)
Supplement: MOESM1 [file 9485888]

Numbers of potentially eligible reviews from each source:

|                                               |                    |
|-----------------------------------------------|--------------------|
| <b>CDSR &amp; DARE</b>                        | n=916              |
| <b>Additional unpublished DARE references</b> | n=630              |
| <b>Further searches on OVID databases</b>     | n=1163             |
| <b>Additional searches in 2008</b>            | n=30               |
|                                               | <b>TOTAL= 2739</b> |

Stage 1: First screening of all records by title only (RJ, FH, SM, SC, JG)

Remove those that do not meet inclusion criteria (n= 2491)

Stage 2. 2<sup>nd</sup> screening of abstracts (RJ, FH, SM, SC, JG). Selected references for full text retrieval

|                                               |                  |
|-----------------------------------------------|------------------|
| <b>CDSR &amp; DARE</b>                        | n=137            |
| <b>Additional unpublished DARE references</b> | n=58             |
| <b>Further searches on OVID databases</b>     | n=31             |
| <b>Additional searches in 2008</b>            | n=16             |
|                                               | <b>TOTAL=248</b> |

Stage 3. De-duplicated and mapped evidence to select higher quality, more recent reviews. Excluded papers that did not meet quality/inclusion criteria; and checked against mapping exercise. A sample checked by another team

Total excluded = 145

Synthesise results using meta-narrative approach.

|                                                  |                   |
|--------------------------------------------------|-------------------|
| <b>CDSR &amp; DARE (including 2008 searches)</b> | n=88              |
| <b>Additional unpublished DARE references</b>    | n=10              |
| <b>Further searches on OVID databases</b>        | n=5               |
|                                                  | <b>TOTAL= 103</b> |
